1  
2  
3  
4  
5  
6  
7  
8  
9  
10  
11  
12  
13  
14  
15  
16  
17  
18  
19  
20  
21  
22  
23  
24  
25  
26  
27  
28  
29  
30  
31

‘We need to feel that the Government value our lives’: Examining Irish women’s experience of cervical screening services

Royanne McGregor<sup>1</sup> and Sarah Foley<sup>1\*</sup>

<sup>1</sup>School of Applied Psychology, University College Cork, Ireland

\* Corresponding author

E-mail: [sarah.foley@ucc.ie](mailto:sarah.foley@ucc.ie)

32

## Abstract

33 Cervical cancer is one of the top three cancers diagnosed in women globally. When women  
34 have access to a testing programme, abnormal cells can be detected to prevent the  
35 development of cancer. Research to date indicates that social and cultural barriers are the top  
36 two barriers in accessing cervical screening. In Ireland there may be a lack of trust in the  
37 National Cervical Screening programme due to previous mishandling of tests, and media  
38 coverage of the impacts of inaccurate screening results in Ireland. To understand impact of  
39 the health scandal on women's trust in cervical screening in Ireland, nine Irish women ages  
40 between 25-65 were interviewed. Data was thematically analysed using a feminist  
41 perspective to centre the women's voices in making sense of their appraisal and engagement  
42 with services. The data analysis resulted in four themes: Personal Reflections on Systemic  
43 Failure; Collective Concern and Blame; Decision Making Influencers and Rebuilding  
44 Knowledge and Trust. This analysis conveys distrust in the Irish Cervical Screening  
45 programme, feelings of anger, and a sense of neglect from the services. Irish women now  
46 place their trust in each other, the experience of their friends, families, their local GP. We  
47 discuss these finding to explore how Irish women have reinterpreted the narrative over the  
48 screening test in Ireland, and the potential to decrease concern around the topic by  
49 incorporating this experience into official narratives. This scandal heightened existing distrust  
50 and concern for the quality of women's screening services, and therefore has global relevance  
51 which can be applied to screening services more generally.

52 **Keywords: Cervical Screening; Women's Health; Irish Health Care Services; Feminist Psychology;**  
53 **Reflexive Thematic Analysis**

54

55

56

57

58

59

60

61

62

63

## Introduction

64 Cervical cancer is ranked in the top three cancers present in women under the age of  
65 45 (1,2) and accounted for 341,831 deaths across the globe in 2020 (3). Despite the high  
66 global mortality rates, cervical cancer is attributed to being one of the most preventable  
67 cancers and has seen a rapid decline in cervical cancer related deaths in Western countries  
68 (4). These reductions have been attributed to greater access to preventative vaccines, and  
69 higher levels of awareness of the importance of screening among women (5). In recent years,  
70 testing for Human Papillomavirus Virus (HPV) during screening has become common  
71 practice. HPV is a sexually transmitted disease (STD) and ranks as the most common STD  
72 worldwide (6). Persistent HPV can cause changes to the cells of the cervix, which may  
73 develop into cervical cancer (7). HPV cervical screening has shown higher accuracy levels  
74 and lower variability compared to cytology-based screening and is now the recommended  
75 screening method across Europe (8).

76 Despite the well-researched and referenced benefits of cervical screening, screening  
77 programmes and uptake varies considerably across the globe (1,2). Previous research has  
78 reported societal and psychological barriers to uptake. Some commonly reported barriers are  
79 fear, embarrassment, a belief of having a low risk of cancer (9), the test taking too long, or  
80 the test being painful (10). Inadequate knowledge and lack of awareness of cervical cancer is  
81 a major universal barrier for testing (11). A systematic review of experiences of the screening  
82 programmes internationally detailed the common reporting of the procedure as a physical and  
83 emotional 'big deal' (12). Furthermore, while the HPV screening method has increased  
84 accuracy and is highly valuable in detection, it has presented additional barriers. Literature  
85 has reported on stigma associated with both the HPV vaccine and screening across cultures,  
86 due to its association with sexual activity. Women have reported being worried about the  
87 perception they are promiscuous, or lacking in loyalty to their partner, resulting in a  
88 reluctance in screening (13,14). In contrast, women who are aware of symptoms, signs,  
89 causes, risk factors and prevention methods of cervical cancer are at an increased probability  
90 of attending screening (10). Additionally, age has been reported as a determining factor in  
91 test uptake, as women who had entered menopause, already had HPV, or were no longer of  
92 childbearing age were less likely feel the need for a test (15,16). The international literature  
93 demonstrates complex social, physical, and psychological barriers to engaging with screening  
94 services, despite the success of screening programmes in early detection of HPV. The Irish  
95 context presents further complexity in relation to engagement with the service, which

96 highlights the impact of intense public scrutiny on trust in screening services. We introduce  
97 the Irish Health Services context below to situate our study.

## 98 **Cervical Screening in Ireland**

99 In Ireland, the national cervical screening programme (CervicalCheck) offers free  
100 cervical smear testing to all Irish women aged between 25-65. Approximately 270,000  
101 women are called per year for screening, with high uptake of 80% reported (7). Despite the  
102 efforts of national screening services, the benefits of screening have been overshadowed by  
103 public awareness of previous inaccurate testing. In 2018, Vicky Phelan, who had had  
104 received a terminal diagnosis was awarded a settlement of €2.5 million against a US  
105 laboratory that had inaccurately missed abnormalities in cervical screening she had  
106 undertaken. She was not told about the previous inaccurate testing at the time of her  
107 diagnosis. The case garnered national and international attention and, in a follow up  
108 investigation, it was reported that over 221 Irish women had received a false negative smear  
109 test result (17). The Scally Report, stated that apologies were only made to 43 women,  
110 meaning the majority were not told they received an incorrect cervical smear result (17).  
111 While public figures vary in terms of the women impacted, it is estimated that up to 30  
112 women have died to date as a result of misdiagnosis (18). These events are commonly  
113 referred to as the ‘CervicalCheck cancer scandal’ in the national and international press and  
114 saw high-profile coverage of women and their families who came forward to share their  
115 experience (18,19). High profile media coverage of the trials, advocacy and deaths of women  
116 including Vicky Phelan, Lynsey Bennett and Emma Mhic Mhathúna have highlighted the  
117 personal loss and suffering caused by the scandal (20). Further, advocacy groups for the  
118 women impacted have reported a sense of ‘deep mistrust’ in women’s health services in  
119 Ireland and calls for reform. An interview study with women who received inaccurate results  
120 examined the psychological impact of receiving this news, detailing a prevailing sense of loss  
121 and injustice in the aftermath (21). Despite reassurance in a follow up report by Dr. Gabriel  
122 Scally that women should be confident in the legitimacy of the service (17) the impact of this  
123 publicity on individual experiences of the screening programme remains under-examined.  
124 Previous qualitative research into the impact of ‘health scandals’ for the provision of  
125 women’s health services, highlights the impact of media coverage of cases on medical  
126 injustice relating to the oral contraceptive pill (22,23). This literature demonstrates the  
127 intersection of politics, power and personal health, where women question the quality of

128 healthcare provision provided to them, within a medical system that has traditional neglected  
129 the unique health needs of women

130 Previous research on the uptake of the screening services in Ireland has examined the  
131 behavioural influences on cervical screening (24). Similar to international research, Irish  
132 women report a perception the test will be uncomfortable, with 67% indicated the test was  
133 “Unpleasant” (25). A study investigating behavioural influencers on cervical screening  
134 uptake among Irish women eligible for screening (26) highlighted the impact of social and  
135 environmental factors, age, knowledge, physical/psychological capacity, and perceptual and  
136 practical influencers (26). For example, older women often felt there was no need for a test if  
137 they were no longer sexually active. This study also noted the role of personal motivation and  
138 the impact of health professionals (26). A qualitative study conducted at the height of public  
139 attention of the scandal noted a ‘loss of trust, faith and confidence in the screening  
140 programme’ (27). Participants mentioned how the increased publicity could have positive  
141 effects such as improved services for the future and an increase in awareness of cervical  
142 screening (27). Taken together, these studies suggest considerable reform and discussion  
143 which centres the concerns of women is needed to rebuild trust in the screening services post-  
144 2018. The Irish CervicalCheck, and the stakeholders involved in the service are faced with  
145 the complex challenge for restoring confidence in the screening programme, while also  
146 examining the lasting impact of the publicity surrounding the scandal on women’s decision-  
147 making to present for screening. Feminist Health Psychology literature conceptualises  
148 reproductive health as ‘entwined with social, cultural, and political practices’(28)p. 2) that  
149 reflect women’s place in society and their ability to exercise control over their reproductive  
150 health. The response to the Cervical Screening Scandal in Ireland is situated within a history  
151 of restricted access to contraception and abortion services, as well as historical mistreatment  
152 of women under the care of the State (29). Recent years have seen process through legislative  
153 changes, access to healthcare, and additional funding for a Women’s Health Action Plan (30).  
154 While this changing healthcare landscape is welcomed, it is important to examine how  
155 women engage with social and political narratives on women’s health and how it pertains  
156 their trust and engagement in cervical screening services. As noted above, there are many  
157 psycho-social barriers facing women when engaging with cervical screening. The Irish  
158 experience has additional socio-political factors that warrant further examination and  
159 response (31).

160 Given the widespread reporting of the fallout after the Cervical Screening Service  
161 scandal in Ireland, and the importance of screening services for early detection of abnormal  
162 cells, it is important to examine the prevailing perceptions of the Cervical Screening Services.  
163 As mentioned above, we employ a feminist health psychology (28,32) perspective to ensure  
164 women's voices are centred in the response to this scandal. In the rest of this paper, we  
165 outline our study design, present findings from a feminist thematic analysis of nine semi-  
166 structured interviews with Irish women, and discuss these findings in light of international  
167 research on feminist-informed health service provision.

## 168 **Study Aims**

169 This study aims to examine the perspectives of a sample of Irish women who engage with  
170 Cervical Screening Services in the Republic of Ireland. Qualitative semi-structured interviews  
171 were conducted with nine women and analysed using feminist reflexive thematic analysis.  
172 The study will seek to answer the following research questions:

- 173 • What are the current perspectives of women attending Cervical Cancer Screening in  
174 Ireland?
- 175 • How is the experience of engaging with the cervical screening programme  
176 constructed in relation to their perceptions of the CervicalCheck Scandal, and wider  
177 women's health services in Ireland?

178

## 179 **Methods**

### 180 **Participant Demographics**

181 Data was obtained through interviews with nine women about their experience of  
182 obtaining a cervical smear test in Ireland in the period between 01/12/2020 and 30/04/2021.  
183 In Ireland, a woman is required to be aged between 25-65 in order to be eligible for the  
184 national cervical screening programme, therefore only females aged between 25-65 have  
185 been recruited for interviews. Gender and presence of a cervix have been used as exclusion  
186 criteria. In agreement with the ethical approval obtained, women who received results  
187 indicating they required further testing or follow up procedures after their latest smear test  
188 have been excluded due to differences in treatment. Convenience sampling strategies were  
189 used to recruit participants. Recruitment materials were shared across the social media and  
190 professional networks of the co-authors, and nine women came forward to participate. As  
191 noted in our findings below, the women who participated often referenced their concerns for

192 others as a motivation to come forward for this study, and wanted to lend their voice to  
193 research on women's health. Table 1 presents details of the participants pseudonyms and  
194 demographic details.

| Pseudonym | Age Category | Number of smear tests |
|-----------|--------------|-----------------------|
| Lola      | 20-25        | 0                     |
| Olive     | 26-31        | 1                     |
| Sally     | 41-46        | +3                    |
| Niamh     | 36-40        | 2                     |
| Emily     | 47-52        | +3                    |
| Eva       | 47-52        | 3                     |
| Aoife     | 26-31        | 1                     |
| Ray       | 36-40        | 2                     |
| Lilly     | 26-31        | 2                     |

195

196 Table 1: *Outline of participants*

197

## 198 **Design**

199 Nine interviews were conducted by the first author, using a semi-structured interview  
200 style with questions focusing on reasoning behind obtaining a cervical smear test, personal  
201 attitudes to the test, motivators, demotivators, influence of the media. Interviews lasted on  
202 average 50 minutes and were conducted via video conference call due to local Covid-19  
203 restrictions. The semi-structured format allows the participant to share new ideas and lead the  
204 conversation whilst the interviewer can ensure all the questions are answered. An interview  
205 schedule was drafted after a comprehensive literature review on the topic to explore women's  
206 perspectives on their own experience of engaging with Cervical Screening. Ethical approval  
207 for this study was received from the University Ethics Committee. A pilot interview was  
208 conducted to ensure the questions were communicated well to participants. All participants  
209 provided written informed consent prior to taking part in the study. Participants were not

210 known to either author prior to the interviews. As cervical smear testing can be a sensitive  
211 topic this format was chosen for its advantages in enabling participants to explore their  
212 thoughts, feelings, and beliefs, and delve deeper into personal and sensitive areas where they  
213 feel comfortable (33).

## 214 **Data Analysis**

215 This study was informed by scholarship from feminist health psychology, which is  
216 concerned with the lives and experience of women and girls in society, whilst examining the  
217 impact gender has on power and influence in society (34). Feminist psychology roots itself in  
218 the understanding of women's power and privilege in society, challenging the disadvantaged  
219 status of women and advocating on their behalf (35). The aim of our feminist reflexive  
220 thematic analysis is two-fold. We wanted to 1) explore the lived experience of women  
221 engaging with Irish cervical screening process, and 2) examine how socially available  
222 rhetoric's based on the public reporting of the CervicalCheck scandal are used by Irish  
223 women to create individual positions. Based on these aims, we applied a reflexive thematic  
224 analysis (36), which takes a feminist perspective (37) Previous literature adopting a feminist  
225 thematic analysis emphasises its strategic use for centring the voices of women (38) while  
226 also informing change in services (39). Thus, in line with previous literature adopting a  
227 feminist approach to thematic analysis (40), we foregrounded the lived experience and  
228 idiographic details of the participants, to acknowledge the personhood of women engaging  
229 with larger health care services, and encourage critical response to the dominant power  
230 structures that have traditionally undervalued this perspective.

231 Once the interviews had been conducted, they were transcribed for data analysis.  
232 Following the established steps of Reflexive Thematic Analysis, this process involved  
233 familiarisation with the data with repeated readings followed by line-by-line coding of each  
234 transcript (36). Feminist thematic analysis falls within the BigQ paradigm, which resists  
235 attempts to reinforce positivist norms within qualitative research (38). With this in mind, we  
236 coded each transcript individually, and then engaged in a process of close comparison of the  
237 analysed data to consider the depth of findings within the coded interviews, and final themes.

## 238 **Researcher positionality**

239 The position of the researcher in relation to their qualitative research is a much-  
240 debated topic, with advantages and disadvantages for both insider and outsider research (41).  
241 As psychology researchers, we adopted a feminist poststructuralism (37) perspective to



242 research design, which emphasises the importance of centring women’s voices, and  
243 examining language of resistance of dominant power structures. Feminist approaches to  
244 qualitative research also call for embodied reflexivity and aims to build a reciprocal  
245 relationship with the participants, sharing knowledge, respect, and empathy. The researcher  
246 takes the position that they are learning from the researched, valuing their input on the given  
247 topic rather than exploiting their data (42). This process involves the researcher embodying  
248 their self in the research (43) and learning from the participants. Feminist approaches also  
249 call for high levels of reflexivity in relation to researcher positionality. In conducting this  
250 research, both authors considered their own positionality regarding the engagement with  
251 women’s health screening services in Ireland and reflected on the shared experiences outlined  
252 within the data. They discussed how this influenced their data analysis and were careful to  
253 report on varied views presented in the data.

## 254 **Results**

255 Our Analysis comprises of four themes: Personal Reflections on Systemic Failure  
256 Collective Concern and Blame; Decision Making Influencers and Rebuilding Knowledge and  
257 Trust. These themes detail the personal reflections on the cervical screening scandal and  
258 mechanisms employed to move past negative appraisals of the service. The findings outline  
259 subjective reflections on how the scandal has lasting impact on women, and their shared  
260 concern for how to move on post-scandal. They further offer insights into the potential ways  
261 forward for the screening service and emphasise the importance of relational trust in  
262 rebuilding confidence. We present the analysis below.

### 263 **Personal Reflections on Systemic Failure**

264 The women we interviewed made sense of their experience within wider reporting of  
265 the 2018 CervicalCheck scandal. This was used to make sense of their own experience of the  
266 service. Participants conveyed little confidence in the smear testing procedure, portraying a  
267 sense of fear or hesitancy in taking up the screening and distrust in the result of the test.  
268 Despite this mistrust, they continued to engage in the services. For example, a sense of  
269 distrust in the service in relation to prominent court cases resulting from inaccurate testing is  
270 conveyed:

271 “All of them court cases...but it also makes me think, do I want to go for a private  
272 smear because the public system has had so many failures, like in a good way they are

273 influencing you but in a bad way as well, where you are questioning everything that has come  
274 back.” Aoife

275 This example highlights the impact of hearing about multiple high profile court cases,  
276 in which women or their family members took legal action against the state and the  
277 laboratory that carried out the testing. The examples drawn on demonstrate conflicted  
278 feelings between taking up the test and acknowledging the failings of the service in the past,  
279 showing how these two concerns are at odds with each other. Elsewhere in the data, Eva  
280 justifies her mistrust in the service:

281 “I think it’s disgraceful obviously because so many people have died from incorrect  
282 answers and incorrect results, and I think people are always nervous about that now.”

283 This example outlines a common declaration across the dataset in which the system is  
284 constructed as ‘disgraceful’ ‘poor’, or ‘a failure’. The participant conveys an idea that all  
285 women are similarly nervous, implying a belief that her worry is not unique, but a shared  
286 concern. Eva further evaluates the screening service based on reporting of the misdiagnosis of  
287 women rather than her own experience of the service.

288 “Obviously poor, having seen the way women have been treated and having to drag  
289 their families through courts and everything and dying in the process, it is deplorable.”

290 This example draws on violent imagery of women being ‘dragged’ through the court  
291 system in a bid to seek justice, and further instances where women have died. A sense of luck  
292 was attributed to a positive screening experience:

293 “There is that slight element of luck the results may not be accurate but it’s better  
294 than nothing.” Lilly

295 This belief that the tests are better than nothing, conveys a reluctant engagement with  
296 services. In contrast, another participant conveys an ease in engaging with the screening  
297 service:

298 “I can honestly say, I’m in and out and it’s not a bother, it’s not a bother, I don’t even  
299 give it a second thought”. Emily

300 This quote is a contrasting but important insight into an alternative evaluation of the  
301 service. This theme highlights how women have interpreted the high-profile coverage of the  
302 misdiagnoses of other women in their overall appraisal of the service. This negative appraisal

303 of the services as a systematic failure, often overrides their personal experience with the  
304 service.

### 305 **Collective concern and blame**

306 The previous theme detailed how the women we interviewed constructed and justified  
307 their personal mistrust of the screening services. Throughout the data, wider concern for how  
308 other women were impacted by the cervical smear scandal was also prevalent. For example,  
309 concern regarding the consequential lower uptake in screening services is raised:

310 “I am concerned that the scandals are putting people off getting them done rather than  
311 showing the problems, like what could happen if you don’t keep on top of it.” Ray

312 This quote shows concern regarding the consequences of the scandals on other  
313 women’s uptake of the screening service. While regularly screening is conveyed as  
314 important, there is a concern that the anger towards scandal has overshadowed the potential  
315 health consequences of not attending screening. Within the data, an alternative interpretation  
316 of how the scandal could be interpreted going forward:

317 “God help the poor women who have lost their lives because of misread smears... like  
318 they are the key reasons why you need to go and get your smear.” Aoife

319 The above example offers a different response to the public awareness of the scandal.  
320 For Aoife, the women directly impacted are viewed as people to honour going forward and a  
321 source of motivation to continue returning for screening. In contrast, the government and  
322 associated health bodies are called out in their handling of the scandal. Elsewhere in the data,  
323 Eva constructs the Government as central actors in reshaping the existing narrative regarding  
324 trust in the service:

325 “They made a mistake, and they should just fess up and we need guarantees that this  
326 will not happen again in the future, we need to feel that the Government value our lives.” Eva

327 This attributes the mistakes made in the scandal to the government, thereby placing a  
328 responsibility on them to reignite trust in the screening services, and further conveys the  
329 importance of mentioning lives are at stake.

330 The errors of the national screening programme have been broadcasted widely across  
331 Irish media. Many participants questioned the wider negative impact of the reporting of the  
332 fallout of the scandal. The impact of this on women who hear this coverage is detailed:

333 “The only time you ever hear about it when it’s in the news is when the HSE have  
334 cocked up the results. It’s literally all doom and gloom surrounding it, it’s never positive.”

335 The above quote conveys the personal impact of hearing only negative coverage of  
336 the service by the media. Olive suggests the media presented a one-sided reporting on the  
337 screening programme, which contributes to continues negative appraisal of the service. This  
338 implies that the media have a role to play in the collective sense-making surrounding the  
339 cervical check services. In contrast, Sally detailed the benefits of the media coverage:

340 “While you think it would never happen to you, it’s helpful having it in the media and  
341 having that in front of your mind reminding you why it’s important to get these tests.”

342 This sentiment echoes previous examples which seek out meaning from the wider  
343 reporting of the scandal. Participants draw on the worst-case scenarios and the impact they  
344 have when presented by the media to the public. This theme conveys the concern over how  
345 the scandal was reported on, and the impact this continued coverage has on women’s  
346 decisions to go for their smear test. Further, responsibility in moving forward is attributed to  
347 the government, the media as well as individuals themselves.

#### 348 **Decision making influencers.**

349 While social and cultural narratives around are drawn on to justify women’s (lack of)  
350 trust and confidence in the screening service, decisions regarding uptake of the test were also  
351 attributed personal experiences with close family, friends and health care providers. This  
352 theme details the how women reflect on lived experience and seek out health information  
353 when deciding to take up the screening invitation.

354 The accessibility of the information available on the national cervical screening  
355 programme plays a vital role in helping women to make an informed choice suited to their  
356 needs. Participants outlined the importance of visibility of this information to counteract the  
357 wider reporting of the mistreatment of women, and the central role of the GP in providing  
358 information:

359 “A lot of people will listen to their GP, you know”. Emily

360 “I think it should be more readily available. You know how they do campaigns like they  
361 put stuff on the back of toilet doors, like you know public toilets and things like that and

362 sponsored ads on Facebook or something and I think when you go to the doctor it should be  
363 like lots of pamphlets there about it.” Eva

364 Despite high-profile campaigns across the media, there is a sense in the data that  
365 information needed to be more visible in social settings, including digital media. Emily  
366 suggests a sense of fear surrounding the test remains:

367 “Well, a barrier really is fear, fear of the whole test, fear of what it involves, fear of... ‘I  
368 don’t know exactly what is about to happen.’”

369 As well as reliable information as a resource to base decisions on, the embodied  
370 experience of the test itself impacted women’s decisions to return for further screening. For  
371 example, Ray described her physical and psychological discomfort during the procedure,  
372 while Eva further described her experience of screening as ‘invasive’:

373 “I was feeling a little bit vulnerable and a bit like yucky.” Ray

374 “It is invasive, and I don’t like that.” Eva

375 The nature of the screening (obtaining swabs of the cervixes) was uncomfortable for  
376 Ray and Eva. They both detailed the experience of attending for screening as evoking a sense  
377 of vulnerability. Perhaps in response to this sense of vulnerability, Ray conveys her  
378 preference for a more ‘friendly’ image of the service itself:

379 “Obviously it is medical, but it is kind of not friendly in a way, probably could do  
380 with a bit of brand work.”

381 Participants expressed that a more ‘patient-friendly messaging’ would be welcomed,  
382 suggesting the service needs a re-brand:

383 “A whole rebranding of it, definitely because it is so outdated, the letters are outdated,  
384 it is so outdated it so not the point, they sent hundreds of leaflets that aren’t even that relevant  
385 and they stress you out.” Aoife

386 This example acknowledges both the efforts of the national screening services to  
387 reach women but considers this process of sending out leaflets as outdated. This call for a  
388 rebrand implies a willingness to continue to engage with the service, despite the distrust  
389 outlined in previous themes. Overall, this theme conveys the potential benefits of rebranding  
390 the official communications of the national screening service as a means of rebuilding trust in

391 the programme. The final theme further details the paths forward women have devised in  
392 order to continue to make use of the screening service.

### 393 **Rebuilding Knowledge and Trust**

394 Due to the mistrust in the institutions responsible for the screening service, the women  
395 we interviewed took on the responsibility to empower themselves and ensure accurate  
396 information and encouragement is passed to others in their social networks. **Participants** also  
397 conveyed the key role of GPs and practice nurses in encouraging women to be tested,  
398 conveying the potential of relational trust and knowledge exchange. There was a sense that  
399 gaining more knowledge about the process allowed for more confidence in seeking out the  
400 screening.

401 For example, Eva outlines how she became more informed about the test through self-  
402 guided education:

403

404 "I didn't know they were now testing for the HPV virus instead of testing for abnormal  
405 cells, I only found that out by accident and that was through a webinar I did."

406 Similarly, another participant outlines how being aware of what is involved in the  
407 screening process helps her feel comfortable during the test:

408

409 "I was nervous going in but the nurse I normally go to she would talk you through  
410 everything she goes through the whole process and that is kind of comforting." Niamh

411

412 As well as educating themselves, the women we interviewed conveyed their sense of  
413 responsibility towards others. Lola described how she would encourage her family to get  
414 tested as she wants to make sure they are safe and looked after for peace of mind for herself:

415

416 "I would want people in my family to get tested just because we hear about all the  
417 negative things that have happened its actually so scary to think like it could cause death."

418

419 The willingness to be open and discuss the topic of cervical smear testing has been  
420 attributed by the participants to encourage others to get tested but also reduce the stigma and  
421 societal collective embarrassment. For example:

422 “I kinda thought it was important to share, that but I did think a few people did book  
423 their appointments based on that conversation being so open.” Ray

424 While participants convey the opportunity to share encouraging accounts of the  
425 screening experience, our participants also presented a concern that the traditional lack of  
426 openness has affected women’s perceptions of the test and permanently challenge the  
427 narrative around smear testing in Ireland. For example:

428 “I just feel it is a really taboo subject when it shouldn’t be, it should just be the same  
429 as any sort of check-up really, and the fact that it’s so taboo I think people don’t want to talk  
430 about it, I don’t know why but it’s like making it the secretive horrible thing.” Olive

431 Here Olive compares the test to a health check to highlight the difference in attitude  
432 between the smear test and other health checks.

433 Moving on from the Cervical Screening Scandal requires the appropriate honouring of  
434 the women who spoke out after receiving inaccurate results:

435 “As terrible and as sad and as tragic it is for people to get the wrong results and it may  
436 be too late for these people, but I think them speaking out helps to save others, and it helps  
437 them take action, definitely it has helped me.” Sally

438 This theme presents the importance of trusted others in reestablishing trust in the  
439 services. However, a sense of ‘too little too late’ is evident in the final illustrative quote,  
440 conveying the complex emotions that remain regarding these services. In the final section, we  
441 discuss the implications of this study for healthcare provision going forward.

442

443

## Discussion

444 This Feminist Reflexive Thematic Analysis examined the experience of engaging with  
445 cervical smear screening in Ireland. Our analysis presents four themes: Personal Reflections  
446 on Systemic Failure; Collective Concern and Blame; Decision Making Influencers and  
447 Rebuilding Knowledge and Trust. The accounts of Irish women convey anger towards the  
448 failure of the services, personal fear for themselves and others engaging with services going  
449 forward, and important considerations for rebuilding trust in the screening programme.  
450 Despite the continued engagement with the screening programme reported by our  
451 participants, the high-profile coverage relating to accounts of the 221 women who had

452 received incorrect smear test results (17) is central to constructing an understanding of the  
453 overall service. This sense of fear and mistrust echoes previous literature in the Irish context,  
454 implying a lasting cultural and personal impact from the fallout for women's health initiatives  
455 (21,27). In the face of this, there was also a sense of individual commitment to their health as  
456 well as a concern for other women and people requiring cervical screening that presents  
457 opportunity for rebuilding trust and continued engagement in the service. Furthermore, the  
458 breakdown in trust experienced as a result of the CervicalCheck scandal has implications for  
459 designing trusted services globally. In the remainder of this section, we discuss the  
460 implications of these qualitative findings for cervical screening services, informed by  
461 feminist health psychology literature (28).

462 Research to date on the fallout of the cervical screening scandal has noted  
463 considerable impact on the women directly involved in receiving inaccurate results and their  
464 families (44). Our analysis provides further insight into how these high-profile cases have  
465 been interpreted to become central to the personal understandings of the service. This builds  
466 on previous literature outlining growing mistrust in the services (27) and provides insight into  
467 the mean-making process women have gone through in recent years. Our findings highlight  
468 how the social narratives regarding the mistreatment of women in Ireland has evolved to  
469 incorporate the cervical screening scandal. This understanding has health implications, as  
470 women shared both concern for themselves and others who may be reluctant to engage with  
471 services. With the increases in distrust in official medical messaging, women in this study  
472 detailed a strong reliance on social relations as a site for rebuilding trust, where women were  
473 trusting each and their own GP rather than the national cervical screening programmes  
474 promotional advertisements and leaflets. Many felt the need to advocate to increase uptake of  
475 cervical screening within their social networks, including one woman from this who study  
476 posted her screening procedure on social media while. Despite personal positive experiences  
477 with the screening service, there was a sense that a failure to any women evoked a personal,  
478 emotional response. For many, the stories of the women who received inaccurate testing had  
479 taken on symbolic meaning, and represented wider evidence of the treatment of women in the  
480 Irish health care sector. This presents important insights into the connections made by our  
481 participants between personal experience and wider social knowledge on the value of  
482 women's health in society (28).

483 The striking concern for others evident in our data set implies an opportunity to  
484 further centre women's voices in the messaging and information on screening, including their



485 fears. Recent research by Klonteig et al. (45) has adopted a co-design approach to cervical  
486 screening services, and further highlighted opportunities for digital tools to support the  
487 healthcare interaction. This expands calls in our data for ‘rebranding’ and points to the role of  
488 digital messaging in reaching women. Further it is an opportunity to ensure women are  
489 informed about the risks and benefits of screening through media campaigns, given the  
490 emphasis in our analysis on the role of public health campaigns and media reporting in  
491 shaping personal evaluation of the service (46).

492         The process of obtaining a cervical smear test was described as “Yucky” “Invasive”  
493 and “uncomfortable”. However, it is worth noting many participants were comfortable with  
494 the process, especially when they were supported by the Health Care Professional conducting  
495 the screening test. Constructions of the experience as invasive and uncomfortable draw  
496 further attention to the embodied experience, and the role of the practitioner in mitigating  
497 these experiences at a facility level. The construction of self-stigma and discomfort in our  
498 analysis demonstrates wider discomfort with embodied expressions of gender, and the ‘leaky’  
499 bodies of women (47). At the time of data collection, self-screening is not available in the  
500 Irish services, but is becoming a more viable option for screening internationally (48,49). The  
501 opportunity to self-administer the test is an opportunity to acknowledge the importance of  
502 choice in women’s reproductive healthcare and acknowledges individual variation in  
503 women’s relationships with their bodies and ability to exercise choice. This aligns with  
504 feminist health literature that calls for acknowledgement of the treatment of women’s bodies  
505 in society, and the need for greater autonomy and choice in reproductive healthcare (50).

506         The Irish government were frequently called out as being responsible for the  
507 mistreatment of Irish women in the CervicalCheck Scandal. Further investment in women’s  
508 health initiatives at a government level is a welcomed step forward in increasing access to  
509 health care, but has an important role creating visible social understandings of the value of  
510 women’s health in society. For example, there was a strong emotional response in our data  
511 towards the women who have died as a result of inaccurate testing. Moving forward, it is  
512 important for the social and official narrative on cervical screening continues to acknowledge  
513 these women as central to the narrative surrounding cervical cancer in Ireland. Recent  
514 examples of welcomed initiatives include The Laura Brennan HPV Vaccine Catch Up  
515 Programme, which was launched in 2023 to honour an advocate who publicly campaigned  
516 for uptake in the HPV Vaccine before her untimely death aged 26 (51). While these examples  
517 are of national significance in Ireland, they convey a more universal implication as to how

518 women interpreted and make sense of the treatment of other women accessing healthcare, and  
519 the personal process involved in making sense of political, social and embodied knowledge  
520 regarding reproductive health. The overwhelming focus on the CervicalCheck Scandal as a  
521 source of knowledge also suggests the need for enhanced investment in educational  
522 interventions. Previous research has reported educational interventions as highly effective in  
523 increasing cervical screening uptake, and may include media-based messaging, community  
524 outreach by healthcare providers and group discussions (52). Through their own advocacy  
525 work, the women in this study have already undergone this process privately where they have  
526 taken to their own social media and friend groups to support each other. Some participants  
527 further noted finding information ‘by accident’ through conversations or online resources.  
528 Increased investment in educational interventions have important role to play in ensuring  
529 information that is shared is from valid, evidence-based sources. This is especially important  
530 when there has been a breakdown in trust in the official services.

531

### 532 **Strengths and Limitations**

533 This study contributes an in-depth perspective on cervical screening experiences in  
534 the Irish context. While our sample size of nine interviews was limited to Irish women,  
535 striking similarities in the accounts offer important insight into how media-led national  
536 discussions on screening and co-opted into personal accounts and experience. All the  
537 participants were Irish Nationals living in Ireland, which brings up questions regarding the  
538 experience of non-Irish nationals in engaging with both the services, and wider experiences  
539 on the scandal. The women who came forward for interview were generally concerned for the  
540 future of services and how to keep other women committed to routine screening. In future  
541 research, it would be important to recruit participants who have disengaged from attending  
542 services, as well as women who required follow up procedures after the initial screening.  
543 Further, given the participants who came forward had engaged in self-directed research on  
544 the process, future research should engage with women who may have less access to digital  
545 health information.

### 546 **Conclusion**

547 The experience of obtaining a cervical smear test in Ireland is at the intersection of  
548 embodied knowledge, cultural understandings of women and healthcare provision. Despite  
549 the benefits of regular cervical screening, the women in our study constructed accounts of

550 fear and a lack of confidence in the cervical screening services. This distrust has resulted in a  
551 sense of reluctant compliance with screening services. The Reflexive Thematic Analysis  
552 conveys the importance of repositioning women's experience as central to the shared  
553 information on screening and calls for a commitment to strong messaging and investment in  
554 the service from official stakeholders.

555

556

557

## References

- 558 1. Arbyn M, Rebolj M, De Kok IMCM, Fender M, Becker N, O'Reilly M, et al. The challenges of  
559 organising cervical screening programmes in the 15 old member states of the European Union.  
560 *Eur J Cancer*. 2009 Oct;45(15):2671–8.
- 561 2. Murfin J, Irvine F, Meechan-Rogers R, Swift A. Education, income and occupation and their  
562 influence on the uptake of cervical cancer prevention strategies: A systematic review. *J Clin Nurs*.  
563 2020 Feb;29(3–4):393–415.
- 564 3. Singh D, Vignat J, Lorenzoni V, Eslahi M, Ginsburg O, Lauby-Secretan B, et al. Global estimates  
565 of incidence and mortality of cervical cancer in 2020: a baseline analysis of the WHO Global  
566 Cervical Cancer Elimination Initiative. *Lancet Glob Health*. 2023 Feb;11(2):e197–206.
- 567 4. M. Yakout S. Cervical Cancer and Screening Test (PAP Test): Knowledge and Beliefs of  
568 Egyptian Women. *AJNS*. 2016;5(5):175.
- 569 5. World Health Organisation. Cervical cancer [Internet]. 2024 [cited 2024 Aug 1]. Available from:  
570 <https://www.who.int/news-room/fact-sheets/detail/cervical-cancer>
- 571 6. Onon TS. History of human papillomavirus, warts and cancer: what do we know today? *Best  
572 Pract Res Clin Obstet Gynaecol*. 2011 Oct;25(5):565–74.
- 573 7. HSE.ie. HSE.ie. 2024 [cited 2024 Aug 1]. The CervicalCheck register. Available from:  
574 <https://www2.hse.ie/conditions/cervical-screening/why-go/register/>
- 575 8. Maver PJ, Poljak M. Primary HPV-based cervical cancer screening in Europe: implementation  
576 status, challenges, and future plans. *Clinical Microbiology and Infection*. 2020 May 1;26(5):579–  
577 83.
- 578 9. Marlow LAV, Chorley AJ, Haddrell J, Ferrer R, Waller J. Understanding the heterogeneity of  
579 cervical cancer screening non-participants: Data from a national sample of British women.  
580 *European Journal of Cancer*. 2017 Jul 1;80:30–8.
- 581 10. Chisale Mabotja M, Levin J, Kawonga M. Beliefs and perceptions regarding cervical cancer and  
582 screening associated with Pap smear uptake in Johannesburg: A cross-sectional study. *PLoS One*.  
583 2021;16(2):e0246574.
- 584 11. Al-Naggar R. Practice and Barriers towards Pap Smear Test from a Public Hospital in Malaysia.  
585 *Journal of Community Medicine & Health Education*. 2012 Jan 1;02.

- 586 12. Chorley AJ, Marlow LAV, Forster AS, Haddrell JB, Waller J. Experiences of cervical screening  
587 and barriers to participation in the context of an organised programme: a systematic review and  
588 thematic synthesis. *Psychooncology*. 2017 Feb;26(2):161–72.
- 589 13. Foster S, Carvallo M, Lee J, Fisher R, Traxler H. An implication of impurity: The impact of  
590 feminine honor on human papillomavirus (HPV) screenings and the decision to authorize  
591 daughter’s HPV vaccinations. *Stigma and Health*. 2021;6(2):216–27.
- 592 14. Peterson CE, Silva A, Goben AH, Ongtengco NP, Hu EZ, Khanna D, et al. Stigma and cervical  
593 cancer prevention: A scoping review of the U.S. literature. *Prev Med*. 2021 Dec;153:106849.
- 594 15. Chaw L, Lee SHF, Ja’afar NIH, Lim E, Sharbawi R. Reasons for non-attendance to cervical  
595 cancer screening and acceptability of HPV self-sampling among Bruneian women: A cross-  
596 sectional study. *PLoS One*. 2022;17(3):e0262213.
- 597 16. Zodzika J, Krumina K, Jermakova I, Kojalo U, Plisko O, Santare D, et al. Post-reproductive aged  
598 women: a lost generation in the cervical cancer screening programme. *Eur J Contracept Reprod  
599 Health Care*. 2021 Feb;26(1):23–8.
- 600 17. Scally G. Dr Gabriel Scally’s Scoping Inquiry into CervicalCheck [Internet]. 2018 [cited 2024  
601 Aug 1]. Available from: [https://www.gov.ie/en/publication/aa6159-dr-gabriel-scallys-scoping-  
602 inquiry-into-cervicalcheck/](https://www.gov.ie/en/publication/aa6159-dr-gabriel-scallys-scoping-inquiry-into-cervicalcheck/)
- 603 18. Carroll R. Vicky Phelan, who exposed Irish smear tests scandal, dies at 48. *The Guardian*  
604 [Internet]. 2022 Nov 14 [cited 2024 Aug 1]; Available from:  
605 [https://www.theguardian.com/world/2022/nov/14/vicky-phelan-exposed-irish-smear-tests-  
606 scandal-dies-cancer](https://www.theguardian.com/world/2022/nov/14/vicky-phelan-exposed-irish-smear-tests-scandal-dies-cancer)
- 607 19. *The Irish Times* [Internet]. [cited 2024 Aug 1]. Emma Mhic Mhathúna obituary: Young mother at  
608 the centre of the cervical cancer scandal. Available from: [https://www.irishtimes.com/life-and-  
609 style/people/emma-mhic-mhathuna-obituary-young-mother-at-the-centre-of-the-cervical-cancer-  
610 scandal-1.3661741](https://www.irishtimes.com/life-and-style/people/emma-mhic-mhathuna-obituary-young-mother-at-the-centre-of-the-cervical-cancer-scandal-1.3661741)
- 611 20. Aodha GN. *TheJournal.ie*. 2021 [cited 2024 Aug 1]. The CervicalCheck controversy: How a vital  
612 cancer screening service is fighting to regain the trust of women. Available from:  
613 <https://www.thejournal.ie/what-is-the-cervicalcheck-controversy-5358081-Feb2021/>
- 614 21. Lynch J, D’Alton P, Gaynor K. Exploring the psychological impact of the cervical cancer  
615 screening failures on women in Ireland: A qualitative study. *Psychooncology*. 2021  
616 Jul;30(7):1167–71.
- 617 22. Geampana A. “One Blood Clot Is One Too Many”: Affected Vocal Users’ Negative Perspectives  
618 on Controversial Oral Contraceptives. *Qual Health Res*. 2019 Aug;29(10):1519–30.
- 619 23. Turrini M. “There Are Many of Us”: Online Testimonies From “Pill Victims” as a New Form of  
620 Health Activism. *Qual Health Res*. 2023 Jun;33(7):567–77.
- 621 24. O’Connor M, Costello L, Murphy J, Prendiville W, Martin C, O’Leary J, et al. ‘I don’t care  
622 whether it’s HPV or ABC, I just want to know if I have cancer.’ Factors influencing women’s  
623 emotional responses to undergoing human papillomavirus testing in routine management in  
624 cervical screening: a qualitative study. *BJOG: An International Journal of Obstetrics &  
625 Gynaecology*. 2014;121(11):1421–30.
- 626 25. Walsh DJ, O’Reilly DM, Treacy F. Factors affecting attendance for a cervical smear test: A  
627 prospective study. 2009;

- 628 26. O'Donovan B, Mooney T, Rimmer B, Fitzpatrick P, Flannelly G, Doherty L, et al. Advancing  
629 understanding of influences on cervical screening (non)-participation among younger and older  
630 women: A qualitative study using the theoretical domains framework and the COM-B model.  
631 *Health Expect*. 2021 Dec;24(6):2023–35.
- 632 27. O'Donovan B, Mooney T, Rimmer B, Fitzpatrick P, Flannelly G, Doherty L, et al. Trust and  
633 cancer screening: Effects of a screening controversy on women's perceptions of cervical cancer  
634 screening. *Prev Med Rep*. 2022 Feb;25:101684.
- 635 28. Ussher JM. Embracing a Feminist Approach to Women's Reproductive Health. *Women's*  
636 *Reproductive Health*. 2023 Jan 2;10(1):1–5.
- 637 29. Earner-Byrne L. The Irish Family: Blame, Agency and the 'Unmarried Mother Problem', 1980s–  
638 2021. *Contemporary European History*. 2023 May;32(2):270–86.
- 639 30. Women's Health Action Plan. Women's Health Action Plan 2022 – 2023 [Internet]. 2022 [cited  
640 2024 Aug 1]. Available from: [https://www.gov.ie/en/publication/232af-womens-health-action-](https://www.gov.ie/en/publication/232af-womens-health-action-plan-2022-2023/)  
641 [plan-2022-2023/](https://www.gov.ie/en/publication/232af-womens-health-action-plan-2022-2023/)
- 642 31. Heavey P. The Irish Healthcare System: A Morality Tale. *Camb Q Healthc Ethics*. 2019  
643 Apr;28(2):276–302.
- 644 32. Gilligan C. In a Different Voice: Psychological Theory and Women's Development [Internet].  
645 Harvard University Press; 1993 [cited 2023 May 5]. Available from:  
646 [https://books.google.ie/books/about/IN\\_A\\_DIFFERENT\\_VOICE.html?id=XItMnL7ho2gC&redi](https://books.google.ie/books/about/IN_A_DIFFERENT_VOICE.html?id=XItMnL7ho2gC&redir_esc=y)  
647 [r\\_esc=y](https://books.google.ie/books/about/IN_A_DIFFERENT_VOICE.html?id=XItMnL7ho2gC&redir_esc=y)
- 648 33. DeJonckheere M, Vaughn LM. Semistructured interviewing in primary care research: a balance  
649 of relationship and rigour. *Fam Med Community Health*. 2019;7(2):e000057.
- 650 34. Marecek J. Feminist Psychology. In: *The Wiley-Blackwell Encyclopedia of Social Theory*  
651 [Internet]. John Wiley & Sons, Ltd; 2017 [cited 2024 Aug 1]. p. 1–3. Available from:  
652 <https://onlinelibrary.wiley.com/doi/abs/10.1002/9781118430873.est0124>
- 653 35. Worell J. Feminism in Psychology: Revolution or Evolution? *The ANNALS of the American*  
654 *Academy of Political and Social Science*. 2000 Sep 1;571(1):183–96.
- 655 36. Braun V, Clarke V. Reflecting on reflexive thematic analysis. *Qualitative Research in Sport,*  
656 *Exercise and Health*. 2019 Aug 8;11(4):589–97.
- 657 37. Weedon C. *Feminist Practice and Poststructuralist Theory*, 2nd Edition | Wiley [Internet]. 1996  
658 [cited 2024 Aug 1]. Available from: [https://www.wiley.com/en-](https://www.wiley.com/en-us/Feminist+Practice+and+Poststructuralist+Theory%2C+2nd+Edition-p-9780631198253)  
659 [us/Feminist+Practice+and+Poststructuralist+Theory%2C+2nd+Edition-p-9780631198253](https://www.wiley.com/en-us/Feminist+Practice+and+Poststructuralist+Theory%2C+2nd+Edition-p-9780631198253)
- 660 38. Clarke V, Braun V. Feminist qualitative methods and methodologies in psychology: A review  
661 and reflection. *bpspowe*. 2019;2(1):13–28.
- 662 39. Spencer C, Mallory A, Toews M, Stith S, Wood L. Why sexual assault survivors do not report to  
663 universities: A feminist analysis. *Family Relations: An Interdisciplinary Journal of Applied*  
664 *Family Studies*. 2017;66(1):166–79.
- 665 40. Jenkinson B, Kruske S, Kildea S. The experiences of women, midwives and obstetricians when  
666 women decline recommended maternity care: A feminist thematic analysis. *Midwifery*. 2017  
667 Sep;52:1–10.

- 668 41. Lewis D. Anthropology and colonialism. *Current Anthropology*. 1973;14(5):581–602.
- 669 42. England KVL. Getting Personal: Reflexivity, Positionality, and Feminist Research. *The*  
670 *Professional Geographer*. 1994;46(1):80–9.
- 671 43. Burns ML. Bodies that speak: Examining the dialogues in research interactions. *Qualitative*  
672 *Research in Psychology*. 2006;3(1):3–18.
- 673 44. D’Alton P, Craddock F, Bergin N, Lynch J. Exploring the lived experience of partners of women  
674 impacted by cervical cancer and the CervicalCheck screening failure in Ireland. *Psychooncology*.  
675 2021 Nov;30(11):1986–9.
- 676 45. Klonteig S, Li J, Halvorsrud R. “My Heart Jumped. Do I Have Cancer?”—Results of a Co-design  
677 Study with Cervical Cancer Screening Participants. In: Pfannstiel MA, editor. *Human-Centered*  
678 *Service Design for Healthcare Transformation: Development, Innovation, Change* [Internet].  
679 Cham: Springer International Publishing; 2023 [cited 2024 Aug 1]. p. 329–51. Available from:  
680 [https://doi.org/10.1007/978-3-031-20168-4\\_19](https://doi.org/10.1007/978-3-031-20168-4_19)
- 681 46. Moorhead SA, Hazlett DE, Harrison L, Carroll JK, Irwin A, Hoving C. A new dimension of  
682 health care: systematic review of the uses, benefits, and limitations of social media for health  
683 communication. *J Med Internet Res*. 2013 Apr 23;15(4):e85.
- 684 47. Shildrick M. Living On; Not Getting Better. *Feminist Review*. 2015 Nov 1;111(1):10–24.
- 685 48. Peelo Dennehy D, Mahon MM, Murphy S, Foley S, Morrissey K. You, me, and HPV: Design  
686 research to explore attitudes towards cervical self-sampling. *International Journal of Human-*  
687 *Computer Studies*. 2024 May 1;185:103221.
- 688 49. Hawkes D, Keung MHT, Huang Y, McDermott TL, Romano J, Saville M, et al. Self-Collection  
689 for Cervical Screening Programs: From Research to Reality. *Cancers (Basel)*. 2020 Apr  
690 24;12(4):1053.
- 691 50. Ussher JM, Chrisler JC, Perz J. Routledge & CRC Press. 2023 [cited 2024 Aug 1]. Routledge  
692 *International Handbook of Women’s Sexual and Reproductive Health*. Available from:  
693 [https://www.routledge.com/Routledge-International-Handbook-of-Womens-Sexual-and-](https://www.routledge.com/Routledge-International-Handbook-of-Womens-Sexual-and-Reproductive-Health/Ussher-Chrisler-Perz/p/book/9781032475240)  
694 [Reproductive-Health/Ussher-Chrisler-Perz/p/book/9781032475240](https://www.routledge.com/Routledge-International-Handbook-of-Womens-Sexual-and-Reproductive-Health/Ussher-Chrisler-Perz/p/book/9781032475240)
- 695 51. Minister for Health and the Brennan Family announce the Laura Brennan HPV Vaccine Catch-up  
696 Programme [Internet]. 2022 [cited 2024 Aug 1]. Available from: [https://www.gov.ie/en/press-](https://www.gov.ie/en/press-release/c5cfc-minister-for-health-and-the-brennan-family-announce-the-laura-brennan-hpv-vaccine-catch-up-programme/)  
697 [release/c5cfc-minister-for-health-and-the-brennan-family-announce-the-laura-brennan-hpv-](https://www.gov.ie/en/press-release/c5cfc-minister-for-health-and-the-brennan-family-announce-the-laura-brennan-hpv-vaccine-catch-up-programme/)  
698 [vaccine-catch-up-programme/](https://www.gov.ie/en/press-release/c5cfc-minister-for-health-and-the-brennan-family-announce-the-laura-brennan-hpv-vaccine-catch-up-programme/)
- 699 52. Mock J, McPhee SJ, Nguyen T, Wong C, Doan H, Lai KQ, et al. Effective lay health worker  
700 outreach and media-based education for promoting cervical cancer screening among Vietnamese  
701 American women. *Am J Public Health*. 2007 Sep;97(9):1693–700.

702

703

704
